# Supplementary material for: Plasma proteomic profiling reveals biomarkers associated with aortic dilation in patients with bicuspid aortic valve
Source: PubMed Central journal article supplement — Ann Transl Med. 2021 Jul;9(14):1182. doi: 10.21037/atm-21-3378 (PMC8350663; doi:10.21037/atm-21-3378), 2021-07
Supplement: atm-09-14-1182-supplementary.pdf [file atm-09-14-1182-supplementary.pdf]

**Table S1** Baseline characteristics of the included BAV patients and healthy controls

| Demographics                     | BAV patients (n=30) | Healthy controls (n=15) | P value             |
|----------------------------------|---------------------|-------------------------|---------------------|
| Age (years)                      | 54.1±13.1           | 51.1±7.0                | 0.403 <sup>a</sup>  |
| Male gender                      | 15 (50.0)           | 12 (80.0)               | 0.063 <sup>b</sup>  |
| Hypertension                     | 10 (33.3)           | 0 (0)                   | 0.019 <sup>b</sup>  |
| Diabetes                         | 1 (0.3)             | 0 (0)                   | >0.999 <sup>b</sup> |
| Coronary artery disease          | 2 (0.7)             | 0 (0)                   | 0.545 <sup>b</sup>  |
| Hyperlipidemia                   | 2 (0.7)             | 0 (0)                   | 0.545 <sup>b</sup>  |
| History of smoking               | 8 (26.7)            | 2 (13.3)                | 0.456 <sup>b</sup>  |
| Ascending aortic diameter (mm)   | 43.9±6.9            | 31.8±2.2                | <0.001 <sup>a</sup> |
| Ascending aortic diameter ≥45 mm | 17 (56.7)           | 0 (0)                   | <0.001 <sup>b</sup> |
| Severity of aortic stenosis      |                     |                         | <0.001 <sup>c</sup> |
| Mild                             | 2 (6.7)             | 0 (0)                   |                     |
| Moderate                         | 7 (23.3)            | 0 (0)                   |                     |
| Severe                           | 21 (70.0)           | 0 (0)                   |                     |

Continuous variables are expressed as means ± standard deviations, and categorical variables as numbers (percentages). Data are compared using <sup>a</sup>Student's t-test, <sup>b</sup>Fisher's exact test, and <sup>c</sup>Cochran-Mantel-Haenszel test. BAV, bicuspid aortic valve.

**Table S2** Baseline characteristics of the patients from whom the aortic smooth muscle cells were harvested

| Patients  | Age (year) | Gender | Hypertension | Ascending aortic diameter (mm) | Aortic stenosis |
|-----------|------------|--------|--------------|--------------------------------|-----------------|
| Control-1 | 38         | Female | No           | N/A                            | No              |
| Control-2 | 22         | Male   | No           | N/A                            | No              |
| BAV-1     | 50         | Female | No           | 43                             | Severe          |
| BAV-2     | 46         | Male   | Yes          | 53                             | Severe          |
| BAV-3     | 74         | Male   | Yes          | 53                             | Severe          |

BAV, bicuspid aortic valve.

**Table S3** DEPs between BAV patients and healthy controls using cutoff values of P<0.05 and fold-change ratio >1.5

| logFC    | AveExpr  | t        | PValue   | adj.P.Val | B        | UNIPROT    | Gene name |
|----------|----------|----------|----------|-----------|----------|------------|-----------|
| 2.767056 | 23.70452 | 3.008633 | 0.004247 | 0.022369  | -2.51371 | P20742     | PZP       |
| 2.628587 | 23.89302 | 5.256278 | 3.70E-06 | 9.55E-05  | 4.167766 | Q9P2P1     | NYNRIN    |
| 2.620848 | 19.26652 | 7.382316 | 2.44E-09 | 3.04E-07  | 11.26183 | P07602     | PSAP      |
| 2.326093 | 24.50175 | 6.706861 | 2.51E-08 | 1.56E-06  | 9.00065  | P59666     | DEFA3     |
| 1.821323 | 18.34192 | 6.975828 | 9.90E-09 | 1.06E-06  | 9.902823 | Q6UY14     | ADAMTSL4  |
| 1.781201 | 17.69439 | 7.788113 | 6.08E-10 | 1.14E-07  | 12.60953 | Q8WZ42     | TTN       |
| 1.740143 | 20.04425 | 6.785227 | 1.91E-08 | 1.30E-06  | 9.263643 | P0DMV9     | HSPA1B    |
| 1.668907 | 17.62123 | 5.757642 | 6.67E-07 | 2.38E-05  | 5.822482 | Q07954     | LRP1      |
| 1.625418 | 22.24402 | 5.873392 | 4.48E-07 | 1.86E-05  | 6.207936 | Q8NBJ4     | GOLM1     |
| 1.577001 | 20.68018 | 5.577753 | 1.24E-06 | 4.21E-05  | 5.225652 | P07237     | P4HB      |
| 1.531367 | 21.56249 | 4.959956 | 1.01E-05 | 0.000228  | 3.205701 | P63241     | EIF5A     |
| 1.525534 | 21.61898 | 8.305536 | 1.05E-10 | 3.01E-08  | 14.30949 | P40925     | MDH1      |
| 1.504118 | 20.60417 | 8.264965 | 1.21E-10 | 3.01E-08  | 14.17707 | P04179     | SOD2      |
| 1.446448 | 21.18032 | 6.859462 | 1.48E-08 | 1.20E-06  | 9.512687 | O15511     | ARPC5     |
| 1.434917 | 20.59583 | 5.983239 | 3.07E-07 | 1.43E-05  | 6.574571 | P14314     | PRKCSH    |
| 1.413736 | 21.89214 | 4.452534 | 5.37E-05 | 0.000855  | 1.598457 | O15143     | ARPC1B    |
| 1.383253 | 19.35201 | 4.002136 | 0.000226 | 0.002731  | 0.229096 | P16109     | SELP      |
| 1.355334 | 18.20865 | 3.483163 | 0.001098 | 0.009255  | -1.25935 | P02452     | COL1A1    |
| 1.343631 | 20.96687 | 3.208893 | 0.002429 | 0.015141  | -1.9983  | O15144     | ARPC2     |
| 1.335867 | 21.95904 | 6.11232  | 1.96E-07 | 1.05E-05  | 7.00626  | P80188     | LCN2      |
| 1.32445  | 17.94713 | 2.89298  | 0.005813 | 0.028606  | -2.80131 | P11216     | PYGB      |
| 1.306756 | 19.73355 | 2.736812 | 0.008788 | 0.037139  | -3.17724 | P62873     | GNB1      |
| 1.276435 | 18.91974 | 3.180461 | 0.002632 | 0.015811  | -2.07277 | Q9NZK5     | ADA2      |
| 1.273504 | 21.82659 | 3.24801  | 0.002173 | 0.014014  | -1.89517 | O15037     | KHNYN     |
| 1.244134 | 20.18369 | 4.280279 | 9.37E-05 | 0.001323  | 1.06744  | Q86U17     | SERPINA11 |
| 1.230921 | 19.33215 | 4.24268  | 0.000106 | 0.001464  | 0.952675 | P24821     | TNC       |
| 1.213669 | 23.9209  | 5.105618 | 6.16E-06 | 0.000154  | 3.676816 | O95810     | CAVIN2    |
| 1.202976 | 18.60707 | 4.912257 | 1.18E-05 | 0.000259  | 3.052263 | P48637     | GSS       |
| 1.197772 | 19.5404  | 3.947472 | 0.000268 | 0.002997  | 0.067391 | Q9Y5C1     | ANGPTL3   |
| 1.1814   | 21.86502 | 5.90132  | 4.07E-07 | 1.79E-05  | 6.301078 | P18669     | PGAM1     |
| 1.158584 | 19.44166 | 2.867433 | 0.006225 | 0.029284  | -2.8638  | P36871     | PGM1      |
| 1.152961 | 18.34589 | 4.311577 | 8.48E-05 | 0.001219  | 1.163292 | Q16706     | MAN2A1    |
| 1.136316 | 18.14065 | 2.964793 | 0.004787 | 0.024525  | -2.62363 | P22897     | MRC1      |
| 1.119627 | 17.90809 | 3.114158 | 0.003171 | 0.017834  | -2.2448  | P29350     | PTPN6     |
| 1.114146 | 21.15054 | 4.466956 | 5.13E-05 | 0.000834  | 1.643291 | P52209     | PGD       |
| 1.100415 | 21.5133  | 5.29247  | 3.27E-06 | 8.97E-05  | 4.286204 | P50395     | GDI2      |
| 1.095313 | 18.11763 | 4.350417 | 7.48E-05 | 0.001119  | 1.282638 | P08758     | ANXA5     |
| 1.09237  | 18.88366 | 4.103652 | 0.000164 | 0.002085  | 0.532145 | Q9H4A9     | DPEP2     |
| 1.072839 | 19.86737 | 3.402571 | 0.001391 | 0.01062   | -1.48023 | P51149     | RAB7A     |
| 1.065709 | 17.47763 | 3.974212 | 0.000247 | 0.002842  | 0.146358 | P07942     | LAMB1     |
| 1.003138 | 21.14033 | 4.127838 | 0.000152 | 0.001999  | 0.604856 | Q04917     | YWHAH     |
| 0.998304 | 19.06763 | 2.30747  | 0.02558  | 0.080393  | -4.1308  | P05067     | APP       |
| 0.972807 | 21.38062 | 3.332812 | 0.001704 | 0.01219   | -1.66895 | O15145     | ARPC3     |
| 0.968451 | 23.04386 | 5.070737 | 6.93E-06 | 0.000167  | 3.563667 | P31146     | CORO1A    |
| 0.967585 | 17.72127 | 3.126464 | 0.003064 | 0.017361  | -2.21304 | P22314     | UBA1      |
| 0.967195 | 23.10594 | 5.988343 | 3.01E-07 | 1.43E-05  | 6.591626 | P26038     | MSN       |
| 0.964596 | 20.40342 | 2.783331 | 0.00778  | 0.033836  | -3.0668  | P55072     | VCP       |
| 0.942494 | 18.14881 | 2.885752 | 0.005927 | 0.028751  | -2.81903 | Q07960     | ARHGAP1   |
| 0.937264 | 18.75228 | 3.478534 | 0.001114 | 0.009255  | -1.27212 | P40189     | IL6ST     |
| 0.921912 | 26.92135 | 4.343473 | 7.65E-05 | 0.001122  | 1.261272 | P02671     | FGA       |
| 0.918051 | 20.36725 | 2.899247 | 0.005716 | 0.028314  | -2.78592 | Q14847     | LASP1     |
| 0.916045 | 19.98295 | 4.769317 | 1.90E-05 | 0.000384  | 2.595146 | Q9BY67     | CADM1     |
| 0.91168  | 25.42008 | 3.464393 | 0.001161 | 0.009543  | -1.31106 | Q9BXR6     | CFHR5     |
| 0.911158 | 19.97956 | 2.879318 | 0.00603  | 0.028751  | -2.83478 | P31150     | GDI1      |
| 0.905598 | 20.76018 | 3.51109  | 0.001011 | 0.008763  | -1.18212 | P29401     | TKT       |
| 0.879173 | 22.29589 | 2.867647 | 0.006221 | 0.029284  | -2.86328 | Q9ULV4     | CORO1C    |
| 0.871934 | 22.81204 | 6.166436 | 1.63E-07 | 9.37E-06  | 7.187463 | Q99497     | PARK7     |
| 0.869974 | 23.75752 | 4.722391 | 2.22E-05 | 0.000425  | 2.446018 | P08637     | FCGR3A    |
| 0.857112 | 20.5012  | 3.108323 | 0.003223 | 0.017916  | -2.25982 | P07384     | CAPN1     |
| 0.848499 | 23.88176 | 2.39104  | 0.020948 | 0.069028  | -3.95491 | P62979     | RPS27A    |
| 0.831939 | 19.43033 | 2.458389 | 0.017781 | 0.060731  | -3.80964 | Q9Y696     | CLIC4     |
| 0.831847 | 19.13566 | 2.591887 | 0.01275  | 0.049673  | -3.51268 | P07307     | ASGR2     |
| 0.831545 | 18.10959 | 2.197487 | 0.033059 | 0.097984  | -4.35471 | P07911     | UMOD      |
| 0.827684 | 21.20568 | 2.343397 | 0.023487 | 0.075724  | -4.05578 | Q9Y2K3     | MYH15     |
| 0.819518 | 18.53301 | 2.403387 | 0.020332 | 0.067593  | -3.92851 | O43396     | TXN1      |
| 0.816386 | 23.23592 | 2.81119  | 0.007229 | 0.032575  | -3.00002 | Q92686     | NRGN      |
| 0.809804 | 19.98158 | 2.188888 | 0.033718 | 0.099258  | -4.37184 | Q7Z7G0     | ABI3BP    |
| 0.808821 | 18.19872 | 3.1974   | 0.001769 | 0.012368  | -1.70405 | P10619     | CTSA      |
| 0.806301 | 23.3074  | 3.179156 | 0.002642 | 0.015811  | -2.07618 | P60709     | ACTB      |
| 0.794206 | 20.13511 | 3.283499 | 0.001964 | 0.012998  | -1.80093 | P09493     | TPM1      |
| 0.785136 | 19.71834 | 3.35652  | 0.001591 | 0.011782  | -1.60507 | P06576     | ATP5F1B   |
| 0.765696 | 21.31632 | 2.91681  | 0.005452 | 0.027368  | -2.74268 | P68036     | UBE2L3    |
| 0.743636 | 22.49809 | 3.535293 | 0.000941 | 0.008508  | -1.1149  | Q15942     | ZYX       |
| 0.742917 | 21.5304  | 2.419202 | 0.019567 | 0.065339  | -3.89455 | Q92496     | CFHR4     |
| 0.737743 | 26.19028 | 3.594723 | 0.000789 | 0.007402  | -0.94875 | P37802     | TALN2     |
| 0.735802 | 26.77309 | 4.560714 | 3.77E-05 | 0.000642  | 1.936072 | P19652     | ORM2      |
| 0.726218 | 22.70613 | 4.182818 | 0.000128 | 0.00174   | 0.770853 | P22392     | NME2      |
| 0.722578 | 19.42471 | 2.355916 | 0.022794 | 0.07448   | -4.02943 | P54289     | CACNA2D1  |
| 0.717511 | 22.65345 | 3.209774 | 0.002423 | 0.015141  | -1.99599 | Q3ZCW2     | LGALS1    |
| 0.706609 | 18.52895 | 2.747383 | 0.008549 | 0.036542  | -3.15226 | P16152     | CBR1      |
| 0.700815 | 26.00444 | 2.670776 | 0.010427 | 0.042388  | -3.33173 | P02675     | FGF       |
| 0.700047 | 26.09667 | 2.700721 | 0.009652 | 0.040109  | -3.26202 | P02679     | FGG       |
| 0.699753 | 19.04766 | 2.124067 | 0.039072 | 0.108646  | -4.49926 | P49721     | PSMB2     |
| 0.69882  | 23.53883 | 3.620495 | 0.00073  | 0.007     | -0.87622 | P78417     | GSTO1     |
| 0.695439 | 18.9113  | 2.496297 | 0.016195 | 0.059078  | -3.72652 | Q9NY97     | BGN2      |
| 0.691181 | 18.62286 | 2.059213 | 0.04516  | 0.120216  | -4.6236  | Q16851     | UGP2      |
| 0.68586  | 21.72962 | 2.423178 | 0.019378 | 0.065     | -3.88598 | Q15555     | MAPRE2    |
| 0.683538 | 19.73187 | 2.132891 | 0.038302 | 0.108468  | -4.4821  | P17174     | GOT1      |
| 0.681045 | 21.99428 | 3.534363 | 0.000944 | 0.008508  | -1.11749 | P61158     | ACTR3     |
| 0.674793 | 18.95101 | 2.156041 | 0.036344 | 0.104159  | -4.4368  | Q9UEW3     | MARCO     |
| 0.662929 | 22.62578 | 3.095966 | 0.003336 | 0.018214  | -2.29159 | P21926     | CD9       |
| 0.660237 | 17.99514 | 2.63897  | 0.011312 | 0.044771  | -3.40517 | Q9UQ80     | PA2G4     |
| 0.659068 | 21.20019 | 2.694965 | 0.009797 | 0.040485  | -3.27546 | P37837     | TALDO1    |
| 0.640482 | 21.61244 | 2.119224 | 0.0395   | 0.10943   | -4.50866 | P61160     | ACTR2     |
| 0.633471 | 20.83872 | 2.84901  | 0.006539 | 0.030191  | -2.90863 | Q8NBP7     | CKSR9     |
| 0.627065 | 23.93667 | 3.340123 | 0.001668 | 0.012114  | -1.64928 | P27797     | PICALR    |
| 0.619891 | 24.00249 | 2.508425 | 0.015716 | 0.058194  | -3.69972 | Q02985     | CFHR3     |
| 0.619094 | 23.17463 | 3.579187 | 0.000826 | 0.007628  | -0.99233 | P62258     | YWHAE     |
| 0.612037 | 21.75361 | 3.155757 | 0.002822 | 0.016588  | -2.13714 | P99999     | CYCS      |
| 0.59931  | 18.83744 | 2.092803 | 0.041911 | 0.114832  | -4.5596  | O75874     | IDH1      |
| 0.595465 | 21.32069 | 2.506177 | 0.015803 | 0.058232  | -3.7047  | P06744     | GPI       |
| 0.59379  | 22.67773 | 2.18733  | 0.033839 | 0.099258  | -4.37494 | P10124     | SRGN      |
| -0.58716 | 21.87824 | -2.87903 | 0.006035 | 0.028751  | -2.83548 | P08493     | MGP       |
| -0.58849 | 18.70042 | -2.30208 | 0.025908 | 0.080745  | -4.14198 | O00194     | RAB27B    |
| -0.58932 | 27.74555 | -3.10717 | 0.003233 | 0.017916  | -2.26278 | O75636     | FCN3      |
| -0.59167 | 21.25995 | -2.90088 | 0.005691 | 0.028314  | -2.78191 | O75144     | ICONS1    |
| -0.59196 | 18.7551  | -2.29254 | 0.026497 | 0.08224   | -4.1617  | P35590     | TIE1      |
| -0.59801 | 20.68082 | -2.51436 | 0.015486 | 0.057628  | -3.68658 | AAO075B6H9 | IGLV4-69  |
| -0.59855 | 27.78072 | -4.60247 | 3.29E-05 | 0.000597  | 2.067192 | P29622     | SERPINA4  |
| -0.6164  | 18.06488 | -2.7871  | 0.007704 | 0.033698  | -3.05779 | P30085     | CMFPK1    |
| -0.61804 | 19.69274 | -3.44969 | 0.001212 | 0.009856  | -1.35145 | Q9ULI3     | HEG1      |
| -0.62678 | 19.32313 | -2.31836 | 0.024928 | 0.079685  | -4.10816 | Q96HR3     | MED30     |
| -0.62733 | 19.11292 | -2.17555 | 0.034763 | 0.101179  | -4.39831 | P24666     | ACP1      |
| -0.62896 | 18.24661 | -2.15658 | 0.0363   | 0.104159  | -4.43575 | P35237     | SERPINB6  |
| -0.63872 | 30.22683 | -3.25388 | 0.002137 | 0.013901  | -1.87963 | P02656     | APOC3     |
| -0.6389  | 18.76625 | -2.30393 | 0.025795 | 0.08073   | -4.13814 | Q15185     | PTGES3    |
| -0.64104 | 32.99921 | -5.53509 | 1.43E-06 | 4.66E-05  | 5.084573 | P02766     | TTR       |
| -0.645   | 20.84826 | -2.55222 | 0.014089 | 0.053769  | -3.60214 | Q9UJJ9     | GNPTG     |
| -0.6547  | 21.39109 | -3.80408 | 0.000418 | 0.004405  | -0.35156 | Q14515     | SPARCL1   |
| -0.665   | 18.11266 | -2.10879 | 0.040437 | 0.111612  | -4.52883 | Q9BS26     | ERP44     |
| -0.66778 | 21.61836 | -2.09333 | 0.041861 | 0.114832  | -4.55858 | P48059     | LIMS1     |
| -0.6922  | 20.12897 | -2.35388 | 0.022906 | 0.07448   | -4.03373 | O14672     | ADAM10    |
| -0.69248 | 20.61653 | -2.3131  | 0.025241 | 0.080304  | -4.11911 | O7536      |           |

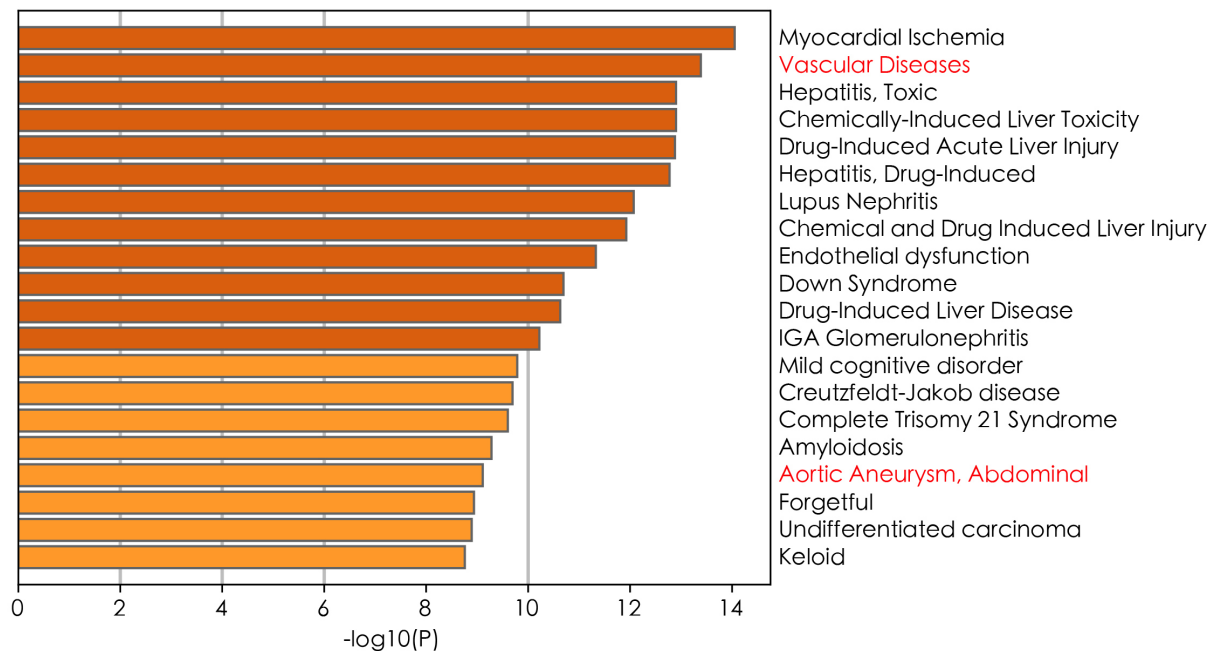

**Figure S1** Disease enrichment analysis of the DEPs between BAV patients and controls. Cardiovascular diseases such as vascular diseases and abdominal aortic aneurysm (labeled red) are highly enriched. DEPs, differentially expressed proteins; BAV, bicuspid aortic valve.

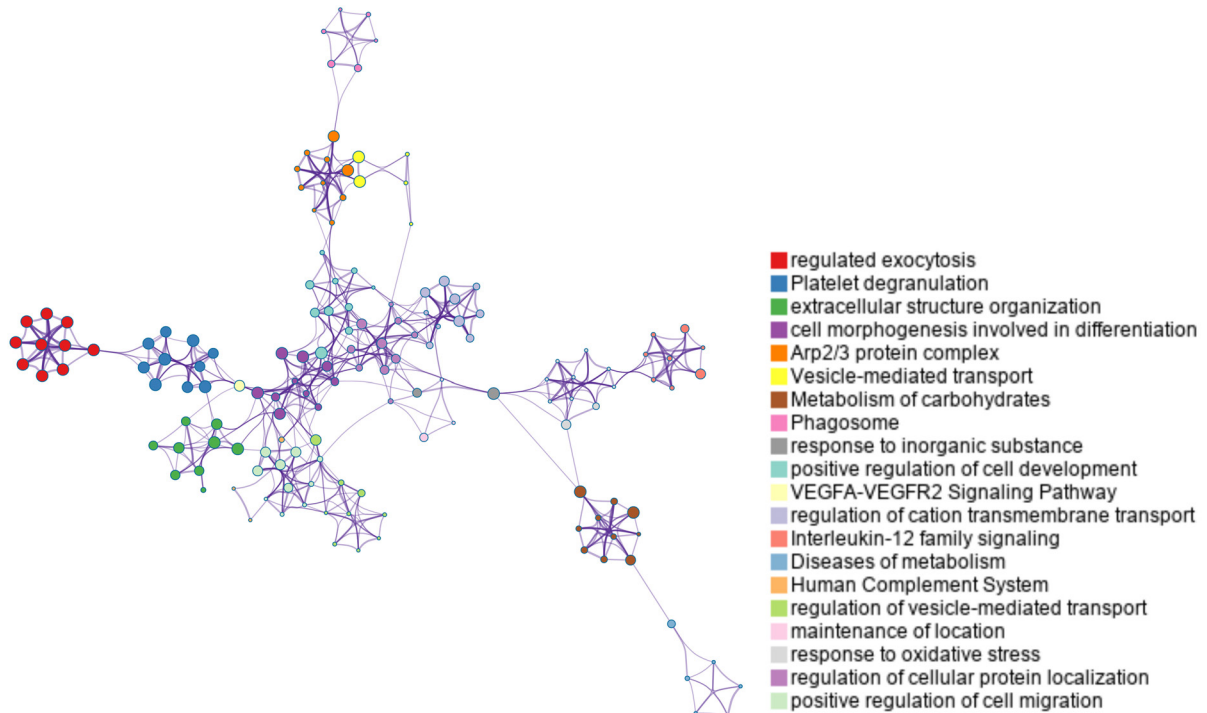

**Figure S2** The top 20 clusters of the enriched biological processes of the DEPs between BAV patients and control. DEPs, differentially expressed proteins; BAV, bicuspid aortic valve.

**Table S4** DEPs between BAV patients with and without progressive aortic dilation using cutoff values of P<0.05 and fold-change ratio >1.5

| P value  | logFC    | Adjust P value | UNIPROT    | Gene name         |
|----------|----------|----------------|------------|-------------------|
| 0.023843 | -0.78052 | 0.375216       | A0A075B6K4 | <i>IGLV3-10</i>   |
| 0.007486 | -1.77323 | 0.294705       | A0A0J9YXX1 | <i>IGHV5-10-1</i> |
| 0.015418 | 0.391122 | 0.365986       | O00533     | <i>CHL1</i>       |
| 0.017985 | -1.40035 | 0.365986       | O14672     | <i>ADAM10</i>     |
| 0.005385 | -2.06706 | 0.260209       | O43488     | <i>AKR7A2</i>     |
| 0.002163 | 1.22667  | 0.257634       | O43493     | <i>TGOLN2</i>     |
| 0.010086 | 1.664424 | 0.328          | O43852     | <i>CALU</i>       |
| 0.018944 | 1.0609   | 0.366444       | O76074     | <i>PDE5A</i>      |
| 0.03157  | -0.57577 | 0.390214       | P00441     | <i>SOD1</i>       |
| 0.020188 | -0.54302 | 0.366444       | P00533     | <i>EGFR</i>       |
| 0.049681 | -0.32422 | 0.502177       | P00568     | <i>AK1</i>        |
| 0.005015 | -0.58994 | 0.260209       | P00740     | <i>F9</i>         |
| 0.00932  | -0.19366 | 0.316878       | P00742     | <i>F10</i>        |
| 0.000971 | 0.304493 | 0.242217       | P01008     | <i>SERPINC1</i>   |
| 0.021269 | -0.37487 | 0.366444       | P01031     | <i>C5</i>         |
| 0.029746 | -1.04776 | 0.390214       | P01876     | <i>IGHA1</i>      |
| 0.03172  | -0.8792  | 0.390214       | P02655     | <i>APOC2</i>      |
| 0.002227 | -2.45432 | 0.257634       | P02741     | <i>CRP</i>        |
| 0.035287 | -0.42657 | 0.410234       | P02753     | <i>RBP4</i>       |
| 0.000256 | 0.508344 | 0.191618       | P05090     | <i>APOD</i>       |
| 0.028416 | -2.59689 | 0.390214       | P05121     | <i>SERPINE1</i>   |
| 0.005419 | -0.36726 | 0.260209       | P05156     | <i>CFI</i>        |
| 0.017291 | -0.48839 | 0.365986       | P07357     | <i>C8A</i>        |
| 0.005568 | 1.556691 | 0.260209       | P07911     | <i>UMOD</i>       |
| 0.026802 | 0.436539 | 0.384033       | P08185     | <i>SERPINA6</i>   |
| 0.000635 | -3.24178 | 0.237391       | P09972     | <i>ALDOC</i>      |
| 0.026296 | -0.56556 | 0.384033       | P0C0L4     | <i>C4A</i>        |
| 0.017998 | 1.462011 | 0.365986       | P10321     | <i>HLA-C</i>      |
| 0.02168  | -1.16282 | 0.366444       | P10644     | <i>PRKAR1A</i>    |
| 0.0031   | 0.686498 | 0.257634       | P10646     | <i>TFPI</i>       |
| 0.036714 | -2.05085 | 0.410234       | P13224     | <i>GP1BB</i>      |
| 0.033175 | 0.678009 | 0.400237       | P13716     | <i>ALAD</i>       |
| 0.020199 | 0.772203 | 0.366444       | P16112     | <i>ACAN</i>       |
| 0.036097 | -1.69914 | 0.410234       | P20023     | <i>CR2</i>        |
| 0.04191  | 0.774869 | 0.454324       | P41240     | <i>CSK</i>        |
| 0.029134 | -1.58522 | 0.390214       | P48426     | <i>PIP4K2A</i>    |
| 0.027211 | -0.56463 | 0.384033       | P48637     | <i>GSS</i>        |
| 0.02432  | -1.90319 | 0.375216       | P49407     | <i>ARRB1</i>      |
| 0.011427 | -0.47361 | 0.356128       | P51149     | <i>RAB7A</i>      |
| 0.014439 | 0.561058 | 0.365986       | P51884     | <i>LUM</i>        |
| 0.008061 | 0.913406 | 0.301471       | P54802     | <i>NAGLU</i>      |
| 0.008881 | -1.92216 | 0.316316       | P54819     | <i>AK2</i>        |
| 0.013363 | -1.41434 | 0.365986       | P55056     | <i>APOC4</i>      |
| 0.018104 | -1.13536 | 0.365986       | P61088     | <i>UBE2N</i>      |
| 0.044376 | -0.638   | 0.474189       | P61916     | <i>NPC2</i>       |
| 0.046453 | -0.86744 | 0.482101       | P62942     | <i>FKBP1A</i>     |
| 0.006589 | -0.30224 | 0.273802       | P62979     | <i>RPS27A</i>     |
| 0.013144 | 0.63441  | 0.365986       | Q12860     | <i>CNTN1</i>      |
| 0.005392 | -1.72557 | 0.260209       | Q14141     | <i>SEPTIN6</i>    |
| 0.025081 | -1.45493 | 0.375216       | Q15019     | <i>SEPTIN2</i>    |
| 0.020735 | 0.698228 | 0.366444       | Q15166     | <i>PON3</i>       |
| 0.037294 | 0.884489 | 0.410234       | Q16706     | <i>MAN2A1</i>     |
| 0.037136 | -2.90432 | 0.410234       | Q4LDE5     | <i>SVEP1</i>      |
| 0.02485  | -1.22303 | 0.375216       | Q6EEV6     | <i>SUMO4</i>      |
| 0.005914 | 1.008333 | 0.260209       | Q76LX8     | <i>ADAMTS13</i>   |
| 0.030199 | 0.852641 | 0.390214       | Q7L591     | <i>DOK3</i>       |
| 0.04705  | 0.741053 | 0.482101       | Q86TH1     | <i>ADAMTSL2</i>   |
| 0.046495 | -0.89383 | 0.482101       | Q8NBJ4     | <i>GOLM1</i>      |
| 0.02245  | 0.743088 | 0.366444       | Q92820     | <i>GGH</i>        |
| 0.014649 | -0.94753 | 0.365986       | Q96HR3     | <i>MED30</i>      |
| 0.017085 | 1.489395 | 0.365986       | Q96NZ9     | <i>PRAP1</i>      |
| 0.015545 | -3.026   | 0.365986       | Q99439     | <i>CNN2</i>       |
| 0.030678 | -2.25868 | 0.390214       | Q99685     | <i>MGLL</i>       |
| 0.003553 | -1.2312  | 0.257634       | Q9BR76     | <i>CORO1B</i>     |
| 0.013768 | -1.65934 | 0.365986       | Q9BS26     | <i>ERP44</i>      |
| 0.003369 | -0.38306 | 0.257634       | Q9BXR6     | <i>CFHR5</i>      |
| 0.016244 | -2.33835 | 0.365986       | Q9HBB8     | <i>CDHR5</i>      |
| 0.022535 | -1.10941 | 0.366444       | Q9HDC9     | <i>APMAP</i>      |
| 0.034891 | -1.40687 | 0.410234       | Q9NZ08     | <i>ERAP1</i>      |
| 0.020586 | 0.870296 | 0.366444       | Q9UBQ6     | <i>EXTL2</i>      |
| 0.001567 | -1.17653 | 0.257634       | Q9UJC5     | <i>SH3BGRL2</i>   |
| 0.002935 | -2.53814 | 0.257634       | Q9UJU6     | <i>DBNL</i>       |
| 0.031822 | -1.11919 | 0.390214       | Q9UQ80     | <i>PA2G4</i>      |
| 0.003789 | -2.23932 | 0.257634       | Q9Y696     | <i>CLIC4</i>      |

DEPs, differentially expressed proteins; BAV, bicuspid aortic valve.
